# Supplementary material for: Dietary Patterns and Progression of Impaired Kidney Function in Japanese Adults: A Longitudinal Analysis for the Fukushima Health Management Survey, 2011–2015
Source: PubMed Central journal article supplement (PMC7827845; doi:10.3390/nu13010168), 2021-01-07
Supplement: nutrients-13-00168-s001.pdf [file nutrients-13-00168-s001.pdf]

Supplementary materials

**Table S1.** Characteristics of participants at baseline according to tertiles of dietary pattern scores, 2011, FHMS ( $n = 14,732$ ).

|                                     | All          | Vegetable pattern |              |                | Juice pattern |              |                | Meat pattern |              |                |
|-------------------------------------|--------------|-------------------|--------------|----------------|---------------|--------------|----------------|--------------|--------------|----------------|
|                                     |              | T1 (lowest)       | T3 (highest) | <i>P</i> value | T1 (lowest)   | T3 (highest) | <i>P</i> value | T1 (lowest)  | T3 (highest) | <i>P</i> value |
| Age (years), mean (SD)              | 61.4 (10.0)  | 57.4 (9.7)        | 65.2 (8.9)   | <0.001         | 60.1 (10.0)   | 62.5 (9.9)   | <0.001         | 63.3 (9.0)   | 59.7 (10.7)  | <0.001         |
| Women, %                            | 59.5         | 55.1              | 63.0         | <0.001         | 50.6          | 66.8         | <0.001         | 54.8         | 64.4         | <0.001         |
| Education ≥vocational university, % | 20.9         | 21.9              | 20.0         | 0.071          | 17.5          | 24.4         | <0.001         | 16.6         | 25.4         | <0.001         |
| Current smoker, %                   | 13.3         | 19.7              | 7.5          | <0.001         | 19.2          | 8.4          | <0.001         | 11.5         | 13.6         | <0.001         |
| Current alcohol drinking, %         | 45.3         | 49.9              | 41.8         | <0.001         | 53.9          | 38.7         | <0.001         | 45.7         | 44.2         | 0.034          |
| Physical activity ≥2 times/week, %  | 42.0         | 29.2              | 55.0         | <0.001         | 33.4          | 50.2         | <0.001         | 44.7         | 40.3         | <0.001         |
| Distress scale ≥13, %               | 14.6         | 15.7              | 14.2         | 0.018          | 13.7          | 15.6         | 0.026          | 14.7         | 15.3         | 0.073          |
| Live at shelter/temporary house, %  | 39.8         | 42.1              | 37.1         | <0.001         | 38.4          | 40.8         | 0.081          | 40.2         | 39.7         | 0.711          |
| BMI (kg/m <sup>2</sup> ), mean (SD) | 23.7 (3.4)   | 23.8 (3.5)        | 23.5 (3.3)   | <0.001         | 23.8 (3.4)    | 23.6 (3.4)   | 0.004          | 23.8 (3.3)   | 23.5 (3.4)   | <0.001         |
| BMI ≥25 kg/m <sup>2</sup> , %       | 32.2         | 33.9              | 30.3         | 0.002          | 32.9          | 30.5         | 0.021          | 34.2         | 30.4         | <0.001         |
| Hypertension, %                     | 50.5         | 46.5              | 54.2         | <0.001         | 50.8          | 50.1         | 0.744          | 55.6         | 46.1         | <0.001         |
| SBP (mm Hg), mean (SD)              | 131.0 (15.8) | 129.8 (16.0)      | 132.0 (15.5) | <0.001         | 131.3 (16.1)  | 130.7 (15.6) | 0.154          | 132.5 (15.6) | 129.5 (16.1) | <0.001         |
| DBP (mm Hg), mean (SD)              | 78.6 (10.1)  | 79.0 (10.3)       | 78.1 (9.8)   | <0.001         | 79.2 (10.2)   | 78.0 (9.9)   | <0.001         | 78.9 (9.9)   | 78.2 (10.2)  | 0.001          |

|                                                 |              |                      |                   |        |                      |                    |        |                      |                   |        |
|-------------------------------------------------|--------------|----------------------|-------------------|--------|----------------------|--------------------|--------|----------------------|-------------------|--------|
| Fasting blood glucose (mg/dl), median (IQR)     | 97 (90, 105) | 96 (90, 104)         | 97 (91, 106)      | <0.001 | 97 (90, 105)         | 96 (90, 105)       | 0.628  | 98 (91, 107)         | 96 (90, 104)      | <0.001 |
| Fasting blood glucose ≥126 mg/dl, %             | 7.0          | 6.7                  | 7.4               | 0.44   | 6.7                  | 7.2                | 0.772  | 8.0                  | 6.0               | <0.001 |
| HbA1C ≥6.5%, %                                  | 6.6          | 6.4                  | 7.2               | 0.099  | 5.9                  | 7.3                | 0.023  | 7.4                  | 5.8               | 0.01   |
| LDL-C (mg/dl), mean (SD)                        | 126.8 (31.7) | 128.4 (32.1.0)       | 125.4 (31.2)      | <0.001 | 124.9 (31.9)         | 128.7 (31.6)       | <0.001 | 126.0 (31.3)         | 126.9 (32.1)      | 0.08   |
| LDL-C ≥140 mg/dl, %                             | 33.2         | 35.5                 | 31.2              | <0.001 | 31.3                 | 35.9               | <0.001 | 31.9                 | 33.7              | 0.063  |
| HDL-C (mg/dl), mean (SD)                        | 60.8 (15.2)  | 60.9 (15.5)          | 61 (15.0)         | 0.529  | 60.3 (15.3)          | 61.6 (15.1)        | <0.001 | 59.4 (14.8)          | 62.5 (15.6)       | <0.001 |
| HDL-C <40 mg/dl, %                              | 5.7          | 5.9                  | 5.3               | 0.318  | 6.3                  | 5.2                | 0.042  | 6.7                  | 4.6               | <0.001 |
| Triglycerides (mg/dl), median (IQR)             | 97 (69, 136) | 99 (70, 142)         | 95 (68, 130)      | <0.001 | 98 (70, 140)         | 96 (69, 132)       | 0.044  | 101 (73, 141)        | 92 (66, 129)      | <0.001 |
| Triglycerides ≥150 mg/dl, %                     | 19.5         | 21.9                 | 17.0              | <0.001 | 21.1                 | 18.1               | <0.001 | 21.3                 | 17.1              | <0.001 |
| eGFR, mL/min/1.73 m <sup>2</sup> , median (IQR) | 74 (67, 82)  | 75 (68, 83)          | 73 (66, 81)       | <0.001 | 75 (68, 83)          | 73 (66, 81)        | <0.001 | 74 (67, 81)          | 75 (68, 83)       | <0.001 |
| Dietary pattern score, median (IQR)             | -            | -0.98 (-1.41, -0.68) | 1.02 (0.73, 1.39) | -      | -0.89 (-1.14, -0.69) | 0.83 (0.48, -1.46) | -      | -0.84 (-1.07, -0.67) | 0.89 (0.46, 1.51) | -      |

BMI body mass index, DBP diastolic blood pressure, eGFR estimated glomerular filtration rate, FHMS Fukushima Health Management Survey, HDL-C high-density lipoprotein cholesterolemia, IQR interquartile, LDL-C low-density lipoprotein cholesterolemia, SBP systolic blood pressure, SD standard deviation, T tertile.

**Table S2.** Characteristics of participants in trajectory groups of eGFR progression, 2011–2015, FHMS ( $n = 14,732$ ).

|                                 | Trajectory groups |                  |               | P value |
|---------------------------------|-------------------|------------------|---------------|---------|
|                                 | Increasing        | Moderate decline | Rapid decline |         |
| Age group, %                    |                   |                  |               | <0.001  |
| 40-49                           | 21.6              | 62.6             | 15.9          |         |
| 50-59                           | 20.5              | 66.4             | 13.1          |         |
| 60-69                           | 17.4              | 69.8             | 12.8          |         |
| 70-89                           | 17.7              | 67.9             | 14.3          |         |
| Sex, %                          |                   |                  |               | <0.001  |
| Men                             | 21.1              | 67.1             | 11.7          |         |
| Women                           | 17.3              | 67.8             | 15.0          |         |
| Education, %                    |                   |                  |               | 0.015   |
| <vocational university          | 18.5              | 67.8             | 13.7          |         |
| ≥vocational university          | 67.8              | 18.5             | 13.7          |         |
| Smoking, %                      |                   |                  |               | <0.001  |
| Never                           | 17.7              | 68.4             | 13.9          |         |
| Former                          | 21.0              | 67.2             | 11.8          |         |
| Current                         | 21.0              | 63.5             | 15.6          |         |
| Alcohol drinking, %             |                   |                  |               | <0.001  |
| Never                           | 17.2              | 68.4             | 14.4          |         |
| Occasional                      | 19.0              | 67.0             | 13.9          |         |
| Regular                         | 20.7              | 66.5             | 12.8          |         |
| Physical activity, %            |                   |                  |               | 0.033   |
| 0-1 time/week                   | 19.4              | 66.6             | 14.1          |         |
| ≥2 times/week,                  | 18.2              | 68.6             | 13.2          |         |
| Distress scale, %               |                   |                  |               | 0.033   |
| <13                             | 19.1              | 67.4             | 13.5          |         |
| ≥13                             | 17.4              | 67.8             | 14.9          |         |
| Residence of post-disaster, %   |                   |                  |               | <0.001  |
| Own/relatives/apartment/rent    | 20.1              | 67.5             | 12.5          |         |
| Live at shelter/temporary house | 17.1              | 67.6             | 15.4          |         |
| BMI (kg/m <sup>2</sup> ), %     |                   |                  |               | 0.803   |

|                                    |      |      |      |        |
|------------------------------------|------|------|------|--------|
| <18.5                              | 18.5 | 67.3 | 14.2 |        |
| 18.5-24.9                          | 18.6 | 67.7 | 13.7 |        |
| ≥25                                | 19.4 | 67.2 | 13.4 |        |
| Hypertension, %                    |      |      |      | 0.001  |
| No                                 | 18.9 | 68.5 | 12.6 |        |
| Yes                                | 18.8 | 66.5 | 14.7 |        |
| Diabetes, %                        |      |      |      | <0.001 |
| No                                 | 18.5 | 68.4 | 13.1 |        |
| Yes                                | 18.9 | 63.2 | 17.9 |        |
| LDL-C ≥140 mg/dl, %                |      |      |      | <0.001 |
| No                                 | 19.0 | 66.4 | 14.6 |        |
| Yes                                | 18.5 | 69.8 | 11.7 |        |
| HDL-C <40 mg/dl, %                 |      |      |      | 0.679  |
| No                                 | 18.9 | 67.4 | 13.7 |        |
| Yes                                | 17.9 | 68.9 | 13.3 |        |
| Triglycerides ≥150 mg/dl, %        |      |      |      | 0.993  |
| No                                 | 18.9 | 67.5 | 13.6 |        |
| Yes                                | 18.9 | 67.4 | 13.7 |        |
| Vegetable dietary pattern score, % |      |      |      | <0.001 |
| T1                                 | 20.0 | 65.7 | 14.3 |        |
| T2                                 | 18.6 | 67.9 | 13.5 |        |
| T3                                 | 17.9 | 68.9 | 13.1 |        |
| Juice dietary pattern score, %     |      |      |      | 0.027  |
| T1                                 | 20.0 | 66.4 | 13.5 |        |
| T2                                 | 18.1 | 67.5 | 14.4 |        |
| T3                                 | 18.4 | 68.6 | 13.0 |        |
| Meat dietary pattern score, %      |      |      |      | 0.021  |
| T1                                 | 18.8 | 68.3 | 13.0 |        |
| T2                                 | 17.8 | 68.3 | 13.9 |        |
| T3                                 | 20.0 | 65.9 | 14.1 |        |

BMI body mass index, FHMS Fukushima Health Management Survey, HDL-C high-density lipoprotein cholesterolemia, LDL-C low-density lipoprotein cholesterolemia, T tertile.

**Table S3.** Cumulative incidence ratios (95% confidence intervals) of impaired kidney function (eGFR <60 mL/min/1.73 m<sup>2</sup>) among dietary patterns in participants without cardiometabolic risk at baseline, 2012–2015, FHMS.

|                                    |                    | Vegetable        |            | Juice            |            | Meat             |            |
|------------------------------------|--------------------|------------------|------------|------------------|------------|------------------|------------|
|                                    |                    | CIR <sup>a</sup> | 95% CI     | CIR <sup>a</sup> | 95% CI     | CIR <sup>a</sup> | 95%CI      |
| BMI (18.5-24.0 kg/m <sup>2</sup> ) | T1 (lowest)        | 1.00             | Referent   | 1.00             | Referent   | 1.00             | Referent   |
|                                    | T2                 | 0.94             | 0.84, 1.06 | 1.01             | 0.89, 1.14 | 0.91             | 0.81, 1.02 |
|                                    | T3                 | 0.89             | 0.79, 1.01 | 1.15             | 1.02, 1.30 | 0.91             | 0.81, 1.02 |
|                                    | <i>P</i> for trend | 0.05             |            | 0.011            |            | 0.172            |            |
| No hypertension                    | T1 (lowest)        | 1.00             | Referent   | 1.00             | Referent   | 1.00             | Referent   |
|                                    | T2                 | 0.99             | 0.85, 1.15 | 1.15             | 0.98, 1.34 | 0.96             | 0.83, 1.11 |
|                                    | T3                 | 0.90             | 0.77, 1.05 | 1.25             | 1.08, 1.46 | 0.91             | 0.79, 1.06 |
|                                    | <i>P</i> for trend | 0.136            |            | 0.005            |            | 0.245            |            |
| No diabetes                        | T1 (lowest)        | 1.00             | Referent   | 1.00             | Referent   | 1.00             | Referent   |
|                                    | T2                 | 0.98             | 0.89, 1.09 | 1.10             | 0.99, 1.22 | 0.94             | 0.85, 1.04 |
|                                    | T3                 | 0.87             | 0.79, 0.97 | 1.19             | 1.07, 1.32 | 0.96             | 0.87, 1.07 |
|                                    | <i>P</i> for trend | 0.009            |            | 0.002            |            | 0.546            |            |
| LDL-C <140mg/dL                    | T1 (lowest)        | 1.00             | Referent   | 1.00             | Referent   | 1.00             | Referent   |
|                                    | T2                 | 1.00             | 0.89, 1.11 | 1.01             | 0.90, 1.13 | 0.98             | 0.88, 1.09 |
|                                    | T3                 | 0.88             | 0.78, 0.99 | 1.17             | 1.05, 1.30 | 1.02             | 0.92, 1.14 |
|                                    | <i>P</i> for trend | 0.015            |            | 0.005            |            | 0.607            |            |
| HDL-C ≥40 mg/dL                    | T1 (lowest)        | 1.00             | Referent   | 1.00             | Referent   | 1.00             | Referent   |
|                                    | T2                 | 0.96             | 0.87, 1.05 | 1.05             | 0.95, 1.15 | 0.98             | 0.90, 1.08 |
|                                    | T3                 | 0.88             | 0.80, 0.97 | 1.15             | 1.05, 1.27 | 1.00             | 0.91, 1.10 |
|                                    | <i>P</i> for trend | 0.007            |            | 0.003            |            | 0.962            |            |
| Triglycerides <150 mg/dL           | T1 (lowest)        | 1.00             | Referent   | 1.00             | Referent   | 1.00             | Referent   |
|                                    | T2                 | 1.00             | 0.90, 1.11 | 1.06             | 0.96, 1.18 | 0.98             | 0.89, 1.08 |
|                                    | T3                 | 0.88             | 0.79, 0.98 | 1.19             | 1.07, 1.32 | 0.99             | 0.89, 1.09 |
|                                    | <i>P</i> for trend | 0.008            |            | 0.001            |            | 0.804            |            |

BMI body mass index, CIR cumulative incidence ratio, eGFR estimated glomerular filtration rate, FHMS Fukushima Health Management Survey, HDL-C high-density lipoprotein cholesterolemia, LDL-C low-density lipoprotein cholesterolemia, T tertile. <sup>a</sup> adjusted for age (continuous), age<sup>2</sup> (continuous), sex, smoking history (never/former/current), alcohol drink (never/occasional/regular), education (<occasional university/≥ occasional university), physical activity (none/1 time per week/2-4 times per week/every day), distress scale (K6<13/K6≥13), residence (temporary house or shelter/others), overweight (no/yes), diabetes (no/yes), hypertension (no/yes), hyper-LDL-C (no/yes), hypo-HDL-C (no/yes), and hypertriglycerides (no/yes), respectively.

**Table S4.** Associations (coefficients) between dietary patterns and the annual change of eGFR (mL/min/1.73 m<sup>2</sup> per year) in participants without cardiometabolic risk at baseline, 2012–2015, FHMS.

|                                       |                    | Vegetable |             | Juice     |             | Meat      |             |
|---------------------------------------|--------------------|-----------|-------------|-----------|-------------|-----------|-------------|
|                                       |                    | $\beta^a$ | 95% CI      | $\beta^a$ | 95% CI      | $\beta^a$ | 95%CI       |
| BMI (18.5-24.0<br>kg/m <sup>2</sup> ) | T1 lowest          | 1.00      | Referent    | 1.00      | Referent    | 1.00      | Referent    |
|                                       | T2                 | 0.23      | −0.03, 0.50 | −0.06     | −0.32, 0.20 | 0.03      | −0.23, 0.29 |
|                                       | T3                 | 0.36      | 0.09, 0.63  | 0.35      | 0.09, 0.61  | 0.09      | −0.17, 0.36 |
|                                       | <i>P</i> for trend | 0.011     |             | 0.013     |             | 0.442     |             |
| No hyperten-<br>sion                  | T1 lowest          | 1.00      | Referent    | 1.00      | Referent    | 1.00      | Referent    |
|                                       | T2                 | 0.28      | −0.01, 0.56 | −0.01     | −0.29, 0.27 | −0.09     | −0.39, 0.20 |
|                                       | T3                 | 0.24      | −0.07, 0.55 | 0.11      | −0.19, 0.40 | 0.18      | −0.12, 0.49 |
|                                       | <i>P</i> for trend | 0.109     |             | 0.621     |             | 0.141     |             |
| No diabetes                           | T1 lowest          | 1.00      | Referent    | 1.00      | Referent    | 1.00      | Referent    |
|                                       | T2                 | 0.27      | 0.05, 0.49  | −0.14     | −0.36, 0.08 | −0.04     | −0.26, 0.17 |
|                                       | T3                 | 0.34      | 0.12, 0.57  | 0.07      | −0.15, 0.29 | 0.08      | −0.14, 0.30 |
|                                       | <i>P</i> for trend | 0.003     |             | 0.497     |             | 0.434     |             |
| LDL-C<br><140mg/dL                    | T1 lowest          | 1.00      | Referent    | 1.00      | Referent    | 1.00      | Referent    |
|                                       | T2                 | 0.30      | 0.04, 0.55  | −0.10     | −0.35, 0.15 | −0.12     | −0.37, 0.14 |
|                                       | T3                 | 0.27      | 0.00, 0.54  | 0.08      | −0.18, 0.35 | 0.01      | −0.24, 0.27 |
|                                       | <i>P</i> for trend | 0.044     |             | 0.646     |             | 0.86      |             |
| HDL-C ≥40<br>mg/dL                    | T1 lowest          | 1.00      | Referent    | 1.00      | Referent    | 1.00      | Referent    |
|                                       | T2                 | 0.22      | 0.01, 0.43  | −0.08     | −0.29, 0.13 | −0.07     | −0.28, 0.14 |
|                                       | T3                 | 0.27      | 0.05, 0.50  | 0.08      | −0.14, 0.29 | 0.03      | −0.18, 0.24 |

|                             |                    |       |             |       |             |       |             |
|-----------------------------|--------------------|-------|-------------|-------|-------------|-------|-------------|
|                             | <i>P</i> for trend | 0.016 |             | 0.601 |             | 0.748 |             |
| Triglycerides<br><150 mg/dL | T1 lowest          | 1.00  | Referent    | 1.00  | Referent    | 1.00  | Referent    |
|                             | T2                 | 0.24  | 0.01, 0.47  | −0.03 | −0.26, 0.19 | −0.09 | −0.31, 0.14 |
|                             | T3                 | 0.19  | −0.05, 0.43 | 0.15  | −0.08, 0.38 | −0.02 | −0.24, 0.21 |
|                             | <i>P</i> for trend | 0.123 |             | 0.317 |             | 0.984 |             |

BMI body mass index, eGFR estimated glomerular filtration rate, FHMS Fukushima Health Management Survey, HDL-C high-density lipoprotein cholesterolemia, LDL-C low-density lipoprotein cholesterolemia, T tertile. <sup>a</sup> Adjusted for age (continuous), age<sup>2</sup> (continuous), sex, smoking history (never/former/current), alcohol drink (never/occasional/regular), education (<occasional university/≥ occasional university), physical activity (none/1 time per week/2-4 times per week/every day), distress scale (K6<13/K6≥13), residence (temporary house/others), overweight (no/yes), diabetes (no/yes), hypertension (no/yes), hyper-LDL-C (no/yes), hypo-HDL-C (no/yes), and hyper-triglycerides (no/yes), respectively.

**Table S5.** Odds ratios (95% confidence intervals) of the eGFR rapid decline group among dietary patterns in participants without cardiometabolic risk at baseline, 2012–2015, FHMS.

|                                       |                    | Vegetable       |            | Juice           |            | Meat            |            |
|---------------------------------------|--------------------|-----------------|------------|-----------------|------------|-----------------|------------|
|                                       |                    | OR <sup>a</sup> | 95% CI     | OR <sup>a</sup> | 95% CI     | OR <sup>a</sup> | 95% CI     |
| BMI (18.5–24.0<br>kg/m <sup>2</sup> ) | T1 (lowest)        | 1.00            | Referent   | 1.00            | Referent   | 1.00            | Referent   |
|                                       | T2                 | 0.87            | 0.74, 1.02 | 1.16            | 0.99, 1.36 | 0.99            | 0.85, 1.17 |
|                                       | T3                 | 0.79            | 0.67, 0.94 | 1.04            | 0.88, 1.23 | 1.07            | 0.91, 1.26 |
|                                       | <i>P</i> for trend | 0.002           |            | 0.731           |            | 0.356           |            |
| No hyperten-<br>sion                  | T1 (lowest)        | 1.00            | Referent   | 1.00            | Referent   | 1.00            | Referent   |
|                                       | T2                 | 0.80            | 0.66, 0.97 | 1.13            | 0.94, 1.37 | 1.06            | 0.88, 1.29 |
|                                       | T3                 | 0.98            | 0.80, 1.21 | 1.02            | 0.84, 1.24 | 1.07            | 0.88, 1.30 |
|                                       | <i>P</i> for trend | 0.657           |            | 0.651           |            | 0.478           |            |
| No diabetes                           | T1 (lowest)        | 1.00            | Referent   | 1.00            | Referent   | 1.00            | Referent   |
|                                       | T2                 | 0.90            | 0.78, 1.04 | 1.06            | 0.92, 1.22 | 1.12            | 0.97, 1.29 |
|                                       | T3                 | 0.82            | 0.70, 0.96 | 0.99            | 0.85, 1.15 | 1.11            | 0.96, 1.28 |
|                                       | <i>P</i> for trend | 0.006           |            | 0.848           |            | 0.216           |            |
| LDL-C<br><140mg/dL                    | T1 (lowest)        | 1.00            | Referent   | 1.00            | Referent   | 1.00            | Referent   |
|                                       | T2                 | 0.85            | 0.73, 0.99 | 1.07            | 0.93, 1.24 | 1.05            | 0.90, 1.21 |
|                                       | T3                 | 0.86            | 0.73, 1.01 | 1.00            | 0.86, 1.17 | 1.09            | 0.94, 1.27 |

|                             |                    |       |            |       |            |       |            |
|-----------------------------|--------------------|-------|------------|-------|------------|-------|------------|
|                             | <i>P</i> for trend | 0.03  |            | 0.817 |            | 0.222 |            |
| HDL-C ≥40<br>mg/dL          | T1 (lowest)        | 1.00  | Referent   | 1.00  | Referent   | 1.00  | Referent   |
|                             | T2                 | 0.87  | 0.77, 0.99 | 1.07  | 0.94, 1.22 | 1.04  | 0.91, 1.18 |
|                             | T3                 | 0.84  | 0.73, 0.96 | 0.98  | 0.86, 1.12 | 1.12  | 0.98, 1.27 |
|                             | <i>P</i> for trend | 0.006 |            | 0.854 |            | 0.082 |            |
| Triglycerides<br><150 mg/dL | T1 (lowest)        | 1.00  | Referent   | 1.00  | Referent   | 1.00  | Referent   |
|                             | T2                 | 0.90  | 0.78, 1.04 | 1.06  | 0.92, 1.22 | 1.05  | 0.91, 1.21 |
|                             | T3                 | 0.80  | 0.68, 0.93 | 0.97  | 0.84, 1.12 | 1.14  | 0.99, 1.31 |
|                             | <i>P</i> for trend | 0.001 |            | 0.694 |            | 0.07  |            |

BMI body mass index, eGFR estimated glomerular filtration rate, FHMS Fukushima Health Management Survey, HDL-C high-density lipoprotein cholesterolemia, LDL-C low-density lipoprotein cholesterolemia, T tertile. <sup>a</sup> Adjusted for age (continuous), age<sup>2</sup> (continuous), sex, smoking history (never/former/current), alcohol drink (never/occasional/regular), education (<occasional university/≥ occasional university), physical activity (none/1 time per week/2-4 times per week/every day), distress scale (K6<13/K6≥13), residence (temporary house or shelter/others), overweight (no/yes), diabetes (no/yes), hypertension (no/yes), hyper-LDL-C (no/yes), hypo-HDL-C (no/yes), and hyper-triglycerides (no/yes), respectively.
